# Supplementary material
Source: Royal Society of Chemistry journal article supplement (doi:10.1039/d6nr00942e)
Supplement: d6nr00942e1.pdf [file d6nr00942e1.pdf]

## **One-Dimensional Wide-Bandgap Semiconductor $\beta$ -Ga<sub>2</sub>O<sub>3</sub> Nanorods for High-Performance Solar-Blind Ultraviolet Photodetectors**

Jiateng Zhang<sup>a</sup>, Zixuan Cheng<sup>a,b</sup>, Yong Wang<sup>\*a,b</sup>, Dingyi Yang<sup>a</sup>, Biao Wu<sup>a</sup>, Cheng Zhang<sup>c</sup>, Ming Li<sup>d</sup>, Zhao Lu<sup>e</sup>, Xuetao Gan<sup>\*f</sup>, Yan Liu<sup>a,b</sup>, Yue Hao<sup>a,b</sup>, Genquan Han<sup>a,b</sup>

*a. Faculty of Integrated Circuit, Faculty of Infor-X, Xidian University, Xi'an 710071, China*

*b. Emerging Device and Chip Laboratory, Hangzhou Institute of Technology, Xidian University, Hangzhou 311200, China*

*c. Fujian Provincial Key Laboratory of Functional Marine Sensing Materials College of Material and Chemical Engineering Minjiang University Fuzhou 350108, P. R. China*

*d. Key Laboratory of Low-dimensional Structural Physics and Application, Education Department of Guangxi Zhuang Autonomous Region, College of Physics and Electronic Information Engineering, Guilin University of Technology, Guilin 541004, PR China*

*e. School of Materials Science and Engineering, Guangxi Key Laboratory of Information Materials, Guilin University of Electronic Technology, Guilin 541004, PR China*

*f. Key Laboratory of Light Field Manipulation and Information Acquisition, Ministry of Industry and Information Technology, and Shaanxi Key Laboratory of Optical Information Technology, School of Physical Science and Technology, Northwestern Polytechnical University, Xi'an, 710129 China*

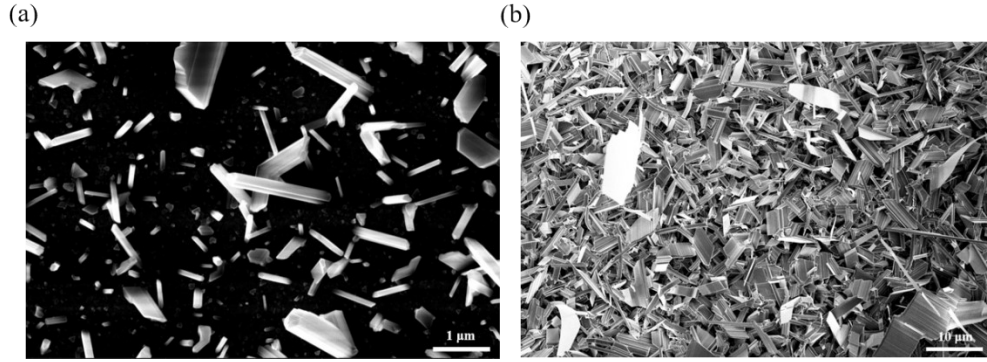

**Fig. S1** SEM images of  $\beta$ -Ga<sub>2</sub>O<sub>3</sub> products obtained under non-optimized LPCVD growth conditions: (a) larger source–substrate distance, (b) higher oxygen partial pressure.

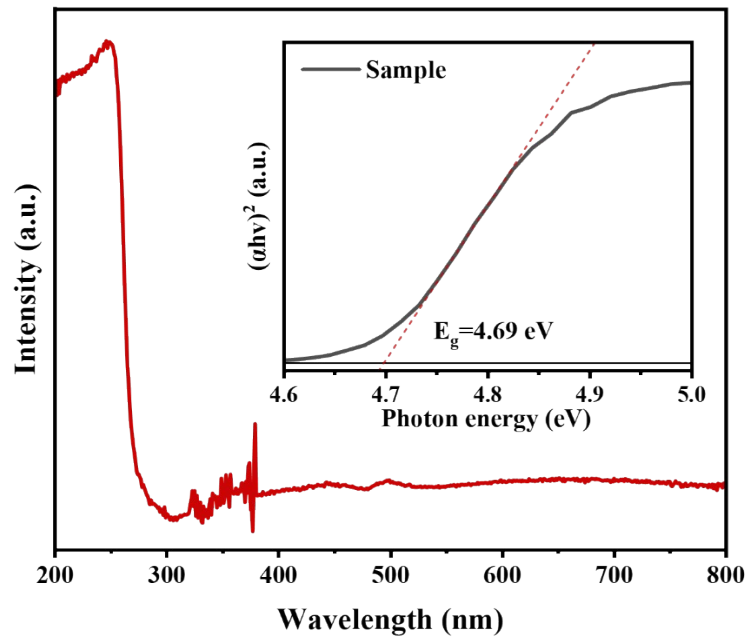

**Fig. S2** UV–Vis absorption spectrum of a companion  $\beta$ -Ga<sub>2</sub>O<sub>3</sub> sample grown on a transparent sapphire substrate. The inset shows the corresponding Tauc plot, from which the optical bandgap is estimated to be approximately 4.69 eV.

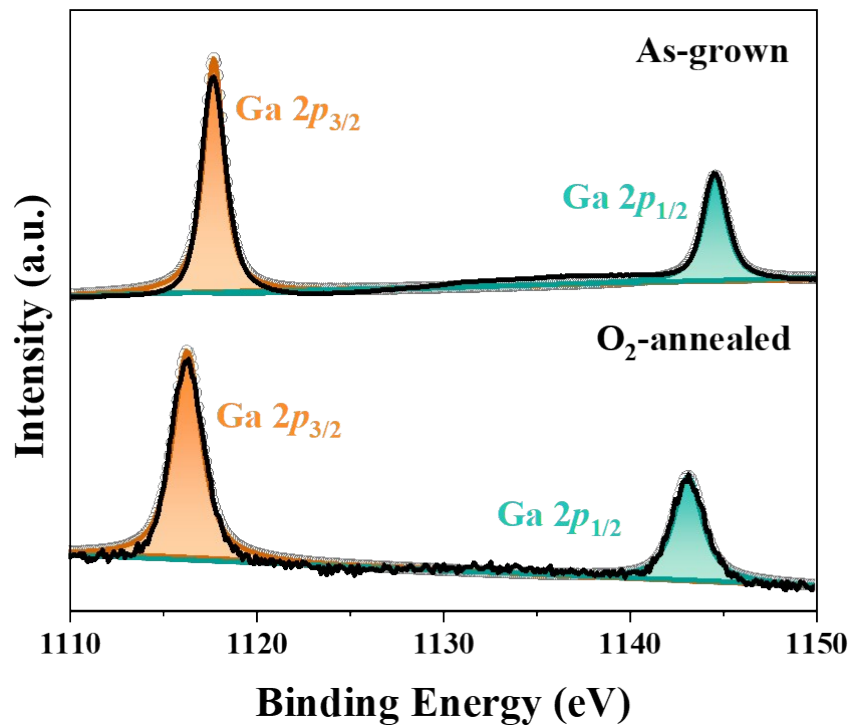

Fig. S3 Ga 2p spectra of  $\beta$ -Ga<sub>2</sub>O<sub>3</sub> nanorods before and after annealing in an oxygen atmosphere.

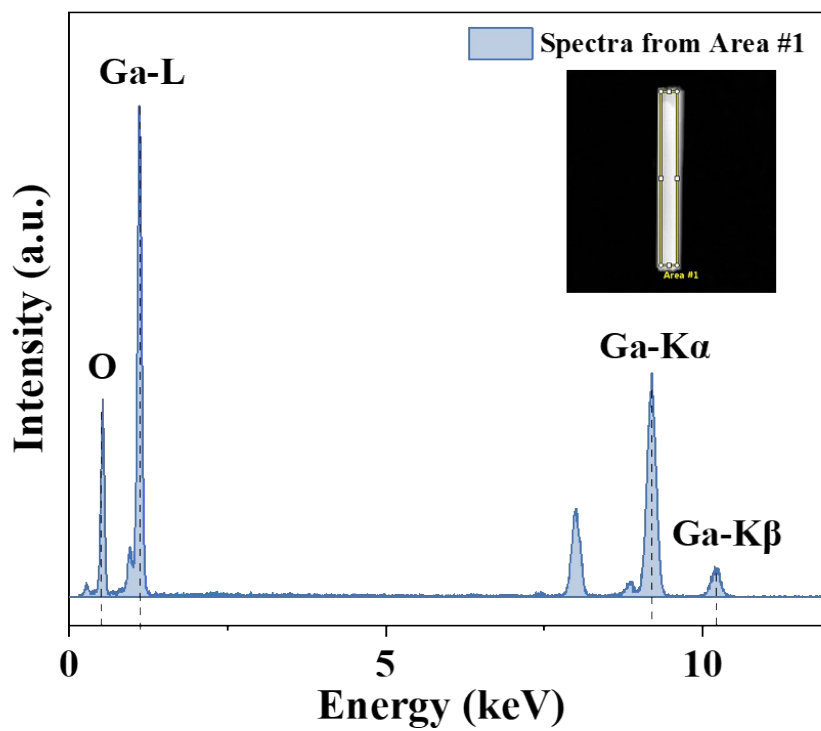

Fig. S4 STEM-EDS of a single  $\beta$ -Ga<sub>2</sub>O<sub>3</sub> nanorod.

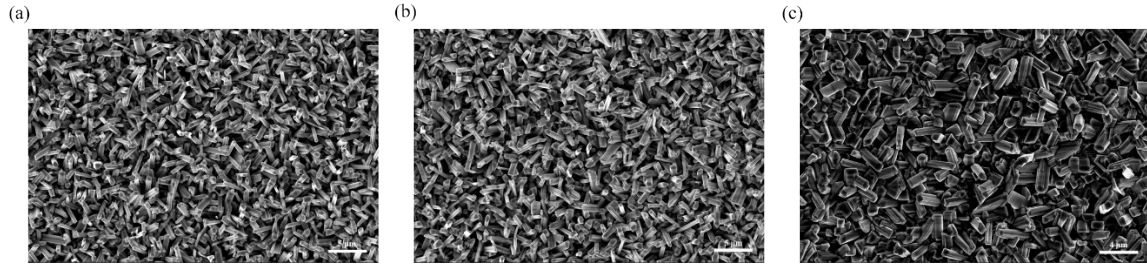

**Fig. S5** Additional SEM images taken from different regions of the optimized  $\beta$ - $\text{Ga}_2\text{O}_3$  nanorod film grown on a  $1 \times 1 \text{ cm}^2$   $\text{SiO}_2/\text{Si}$  substrate.

| PEAK                                          | BE (eV) | FWHM(eV) | Area     |
|-----------------------------------------------|---------|----------|----------|
| O-Ga(As-grown)                                | 530.7   | 1.34     | 506306.2 |
| $\text{V}_\text{O}$ (As-grown)                | 532.2   | 1.96     | 156949.9 |
| O-Ga( $\text{O}_2$ -annealed)                 | 530.7   | 1.48     | 751789.4 |
| $\text{V}_\text{O}$ ( $\text{O}_2$ -annealed) | 532.2   | 1.80     | 67661.05 |

**Table S1** XPS spectral deconvolution of O 1s.

| Method       | Morphology       | Wavelength | PDCR              | Rise/Decay Time              |
|--------------|------------------|------------|-------------------|------------------------------|
| Hydrothermal | Nanorod array    | 254nm      | 9.14              | 0.64 / 0.38 s <sup>[1]</sup> |
| CVD          | Single microwire | 254nm      | $2.5 \times 10^3$ | 0.37 / 0.25 s <sup>[2]</sup> |
| Mist-CVD     | Thin film        | 254nm      | 100               | NR <sup>[3]</sup>            |
| MOCVD        | Thin film        | 254nm      | $2.3 \times 10^3$ | 0.38 / 0.11s <sup>[4]</sup>  |
| This         | Nanorod film     | 254nm      | $6 \times 10^3$   | 0.30 / 1.61 s                |

**Table S2.** Comparison of representative MSM  $\beta$ - $\text{Ga}_2\text{O}_3$  photodetectors prepared by different methods.

**Reference :**

- [1] Wang S, Chen K, Zhao H, et al.  $\beta$ -Ga<sub>2</sub>O<sub>3</sub> nanorod arrays with high light-to-electron conversion for solar-blind deep ultraviolet photodetection. *RSC Adv.*, 2019, 9, 6064–6069.
- [2] Feng Q, Dong Z, Liu W, et al. High responsivity solar-blind UV photodetector based on single centimeter-sized Sn-doped  $\beta$ -Ga<sub>2</sub>O<sub>3</sub> microwire. *Micro and Nanostructures*, 2022, 167, 207255.
- [3] Xu Y, An Z, Zhang L, et al. Solar blind deep ultraviolet  $\beta$ -Ga<sub>2</sub>O<sub>3</sub> photodetectors grown on sapphire by the Mist-CVD method. *Opt. Mater. Express*, 2018, 8, 2941–2947.
- [4] Ma Y, Tang W, Chen T, et al. Effect of off-axis substrate angles on  $\beta$ -Ga<sub>2</sub>O<sub>3</sub> thin films and solar-blind ultraviolet photodetectors grown on sapphire by MOCVD. *Mater Sci Semicond Process*, 2021, 131: 105856.
